# Supplementary material
Source: publisher site journal article supplement (https://www.dovepress.com/article/244486)
Supplement: Supplementary file 1 [file get_supplementary_file.php]

# Supplementary Figure

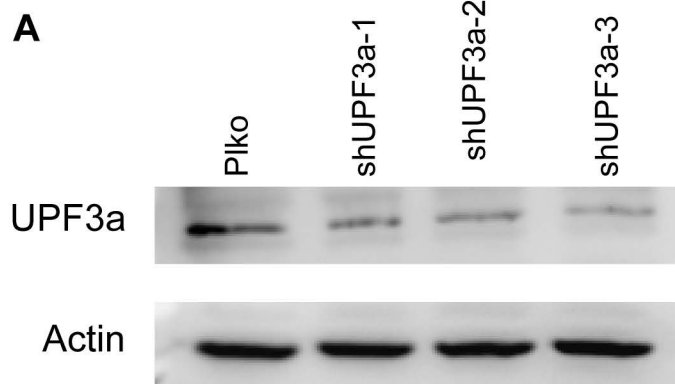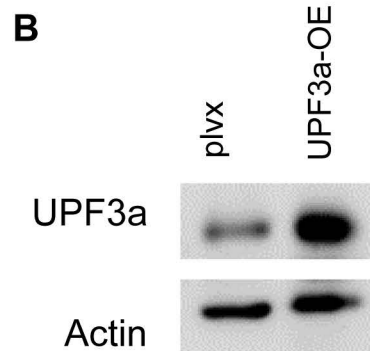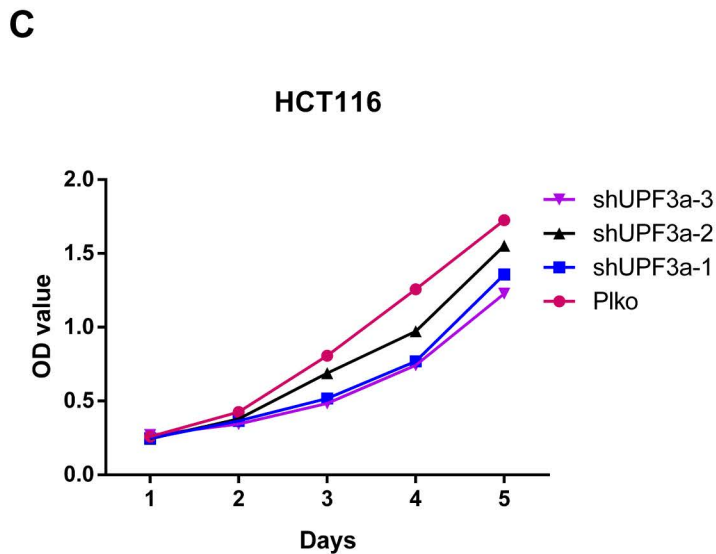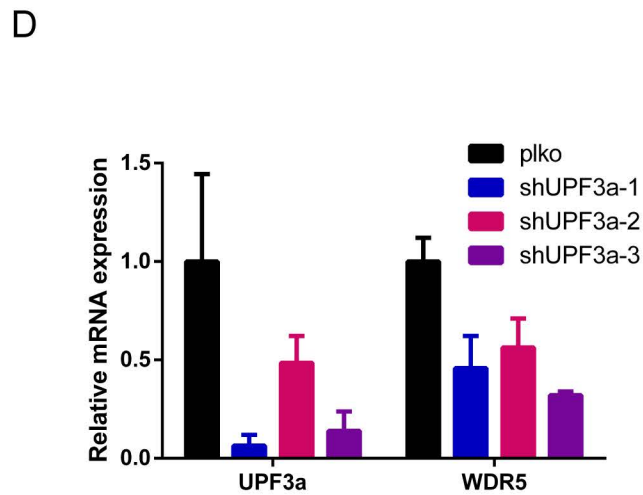

## **Supplementary Figure**

(A) Western blotting test confirmed the effect of shUPF3a in HCT116 cells.

(B) Western blotting test confirmed the effect of UPF3a overexpression in HCT116 cells

(C) CCK8 assay confirmed the impaired potential of proliferation in shUPF3a HCT116 cells.

(D) WDR5 mRNA was downregulated in UPF3a knockdown HCT116 cells.
